# Supplementary material for: Cohesin Protects Genes against γH2AX Induced by DNA Double-Strand Breaks
Source: PubMed Central journal article supplement (PMC3261922; doi:10.1371/journal.pgen.1002460), 2012-01-19

A

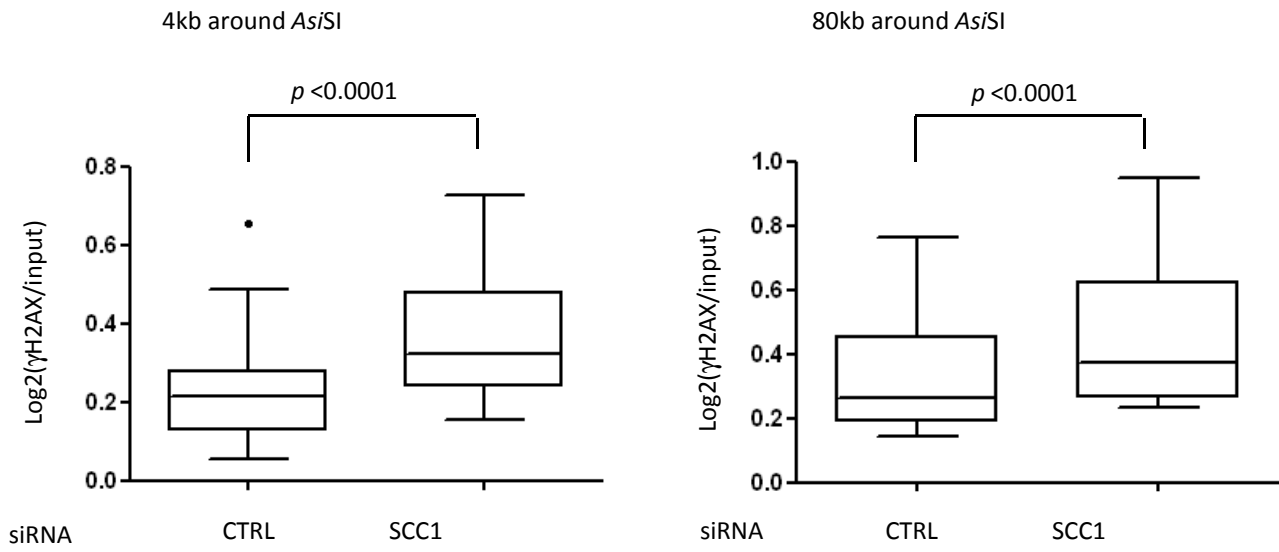

B

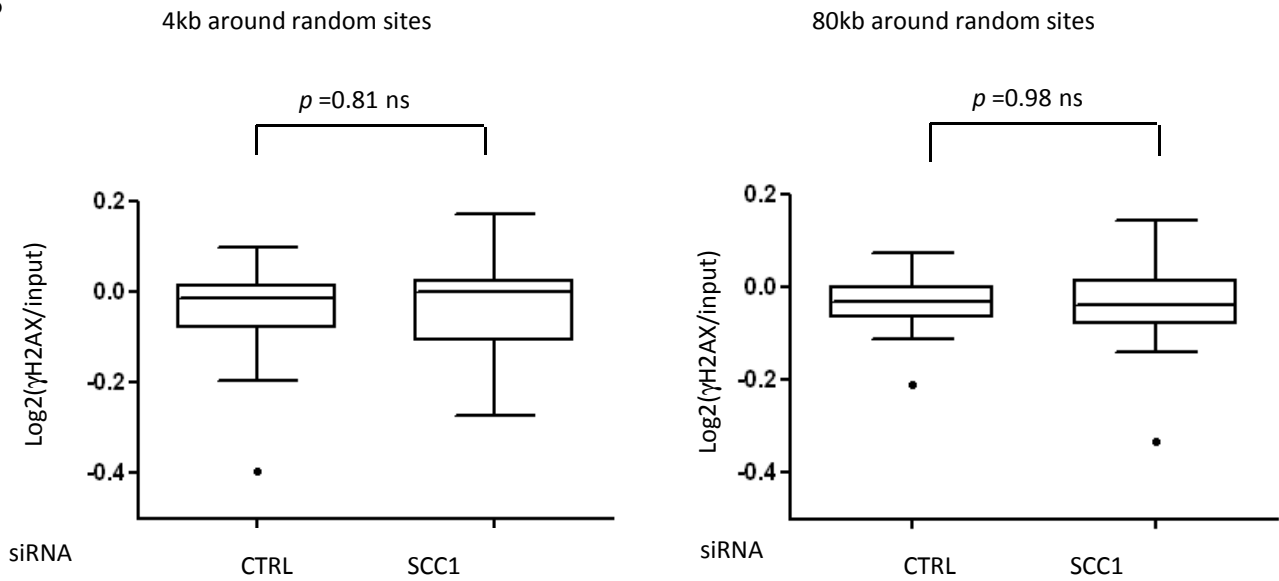

Supplement: pgen.1002460.s014.pdf [file pgen.1002460.s014.pdf]
