# Supplementary material for: Cohesin Protects Genes against γH2AX Induced by DNA Double-Strand Breaks
Source: PubMed Central journal article supplement (PMC3261922; doi:10.1371/journal.pgen.1002460), 2012-01-19
Supplement: pgen.1002460.s027.pdf [file pgen.1002460.s027.pdf]

| Chr  | beg       | end       |
|------|-----------|-----------|
| chr1 | 9572021   | 9572029   |
| chr1 | 9634441   | 9634449   |
| chr1 | 14015263  | 14015271  |
| chr1 | 19684730  | 19684738  |
| chr1 | 25445630  | 25445638  |
| chr1 | 40747219  | 40747227  |
| chr1 | 89231173  | 89231181  |
| chr1 | 91970651  | 91970659  |
| chr1 | 109838211 | 109838219 |
| chr1 | 202647064 | 202647072 |
| chr1 | 206483399 | 206483407 |
| chr1 | 222099259 | 222099267 |
| chr1 | 229070845 | 229070853 |
| chr1 | 240754390 | 240754398 |
| chr6 | 20320288  | 20320296  |
| chr6 | 27253334  | 27253342  |
| chr6 | 27769868  | 27769876  |
| chr6 | 31213395  | 31213403  |
| chr6 | 37429778  | 37429786  |
| chr6 | 50025530  | 50025538  |
| chr6 | 90404896  | 90404904  |
| chr6 | 135861029 | 135861037 |
| chr6 | 144649250 | 144649258 |
| chr6 | 149929787 | 149929795 |
