# Supplementary material for: Cohesin Protects Genes against γH2AX Induced by DNA Double-Strand Breaks
Source: PubMed Central journal article supplement (PMC3261922; doi:10.1371/journal.pgen.1002460), 2012-01-19
Supplement: pgen.1002460.s028.pdf [file pgen.1002460.s028.pdf]

| chr  | Beg       | End       |
|------|-----------|-----------|
| chr1 | 8876505   | 10941655  |
| chr1 | 13683067  | 14206694  |
| chr1 | 14574013  | 15458248  |
| chr1 | 18828602  | 20690157  |
| chr1 | 25348306  | 25632473  |
| chr1 | 40179689  | 41335924  |
| chr1 | 88842752  | 90338214  |
| chr1 | 91760343  | 92168228  |
| chr1 | 108777284 | 110795366 |
| chr1 | 202298996 | 203253833 |
| chr1 | 206238504 | 206519991 |
| chr1 | 228256963 | 229846958 |
| chr1 | 240661371 | 241078266 |
| chr6 | 20217865  | 20514974  |
| chr6 | 27172801  | 28462497  |
| chr6 | 29797046  | 32294998  |
| chr6 | 36703459  | 38763996  |
| chr6 | 49522738  | 50675025  |
| chr6 | 89690126  | 91368262  |
| chr6 | 135582363 | 135980869 |
| chr6 | 144300589 | 144928926 |
| chr6 | 149152755 | 150552914 |
