# Supplementary material for: Cohesin Protects Genes against γH2AX Induced by DNA Double-Strand Breaks
Source: PubMed Central journal article supplement (PMC3261922; doi:10.1371/journal.pgen.1002460), 2012-01-19
Supplement: pgen.1002460.s029.pdf [file pgen.1002460.s029.pdf]

Primers for Q-PCR  
ChIP / Cleavage

|                         |                               |                               |
|-------------------------|-------------------------------|-------------------------------|
| ARV1                    | FW : ACAAGGGGAGAAGCATTGTG     | REV : GTTGCCCATTTCCACTCAAC    |
| CTNNBIP1                | FW : AGTAGTGGGCCTTGGGCTAT     | REV : TGGCCAGGTCCTTGTATTTTC   |
| GNAI3                   | FW : CGGGAGGGCATTATGAGTTA     | REV : TCCTCAGGGAGAGGAGTTGA    |
| AMIGO1                  | FW : AAAGTGAATTCGCTGCACCT     | REV : GCCCTTCAGTGGTACCTCAA    |
| ATXN7L2                 | FW : CCTCCCTGCACCTACCCTAT     | REV : TCCACTCTCCCAAGCTCACT    |
| I-SCE-1<br>(300bp)      | FW : GGCCACAAGTTCAGCGTGTG     | REV / AAGCACTGCACGCCGTAGGT    |
| I-SCE-1<br>(2460bp)     | FW : CTGGTCATCATCCTGCCTTT     | REV : ATGCAGATCGAGAAGCACCT    |
| DSB4_4000bp             | FW : CCTTCTTTCCAGTGGTTCA      | REV : GTGGTCTGACCCAGAGTGGT    |
| DSB4_0.14MB             | FW : TCAACTCTCCTGCCTCCCTA     | REV : CCCTTTGCATATCTCCTCCA    |
| DSB5_800bp              | FW : TTCCTGCAGCCTCATTTTCT     | REV : TGATGATGCCTTTTCCCTTC    |
| DSB3_0.44MB             | FW : GCATCACCTTGTCCCTTCAT     | REV : CTATTCGCTCAGCTGCTCCT    |
| GBP5                    | FW : GCAGACAGGATCTCCAAAGC     | REV : CCCAGGTTCAGTAAGCAAA     |
| GBP6                    | FW : GGGAGGCTCTTCTAGTTGG      | REV : TGATTCTGTCCTGCCAGATG    |
| No DSB                  | FW : CCCATCTCAACCTCCACT       | REV : CTTGTCCAGATTGCTGTGA     |
| DSB1_80bp               | FW : GATTGGCTATGGGTGTGGAC     | REV : CATCCTTGCAAACCAGTCCT    |
| DSB2_200bp              | FW : TGCCGGTCTCCTAGAAGTTG     | REV : GCGCTTGATTTCCCTGAGT     |
| Cohesin<br>Binding Site | FW : CAGCTCTGTGCTCCTGTCTTATCC | REV : CAGCTATAATTGATGAAGAGGCG |
| GAPDH                   | FW : GAAGGTGAAGGTCGGAGTCA     | REV : GAAGATGGTGATGGGATTTTC   |
| DSB1_319bp              | FW : AGGACTGGTTTGCAAGGATG     | REV : ACCCCCATCTCAAATGACAA    |
| DSB1_500bp              | FW : CCTGGATATGAGTTTGATCAGC   | REV : CTCTCCTTTGCTGACACTG     |
| DSB1_1019bp             | FW : AGGAATTGACTGCGGTGTTC     | REV : GGGGAGGAGGAAAGGTGTAG    |
| DSB1_2500bp             | FW : GCCATAACAGAGGGTGAAA      | REV : AACTTTAGGATGGGGCTGCT    |
| DSB1_3200bp             | FW : ACATGGGTCTCCAGGTGAC      | REV : GGAACCTACAACCCACACTT    |
| DSB3_41kb               | FW : GCATCACCTTGTCCCTTCAT     | REV : CTATTCGCTCAGCTGCTCCT    |
| DSB3_0.78Mb             | FW : GCTCTTCCCTGTGAGGTCTG     | REV : CGATGAAACAGGCAAATGA     |
| DSB3_1.14Mb             | FW : GCATGCATCTAGGGTCACT      | REV : AGGTTGCATAGGGCAACTCA    |
| DSB3_1.42Mb             | FW : GGAAGTCAGCCGTGAGACC      | REV : AGCGTCCCTCGAAGTACAAA    |
| DSB3_1.45Mb             | FW : GCTAGAGGCTCTGCTCTGGA     | REV : GGGGTATCTAGCCCTCGTTC    |
| DSB3_1.49Mb             | FW : ATGTGTTCTTTGCGACACCA     | REV : TGCAAGGGAAGAAAATGTCC    |

## Caron et al, Table S3

Primers for Q-PCR  
RT

|          |                           |                             |
|----------|---------------------------|-----------------------------|
| SARS     | FW : CTGGCCTGTCTACCTGCTTC | REV : CTGGCAGCATGATTCAAAGA  |
| PSRC1    | FW : GGGAAAAGAGGTCACCTTCC | REV : AAGCAGGCCAGAGTCCAGTA  |
| GNAI3    | FW : GGGGTACAAGCTTGCTTCAG | REV : TTGGCCACCTACATCAAACA  |
| ARV1     | FW : AACCAGGAGGCCAAAGAGTT | REV : CCACCACCTCAGGTATGCTT  |
| AMIGO1   | FW : CCAAGTAATGAACGGGTGCT | REV : CTGTGTTGAGGGTGTCCATGG |
| ZFAND3   | FW : GGAGGAAGCCATCATGAAAA | REV : TGGCTGGCTAAAGAAAGGAA  |
| AMPD2    | FW : CGTAGTGCCCCGTATGAGTT | REV : CGAGTCACTGTCCGTCTTCA  |
| CTNNBIP1 | FW : TTGGCTGCAGGAAGAACTT  | REV : GCAGCCAATCAGACCTCTTC  |
| P0       | FW : GGCGACCTGGAAGTCCAAC  | REV : CCATCAGCACCCAGCCTTC   |
| SCC1     | FW : TGACTTTGATCAGCCACTGC | REV : TCTCAGGATCATCCATTCCA  |

siRNA

|        |                            |                             |
|--------|----------------------------|-----------------------------|
| siSCC1 | FW : GGUGAAAAUGGCAUUACGGtt | REV : CCGUAAUGCCAUUUCACct   |
| siCtrl | FW : CAUGUCAUGUGUCACAUCUtt | REV : AGAUGUGACACAUGACAUGtt |

Biot-oligo

|               |                                    |                                            |
|---------------|------------------------------------|--------------------------------------------|
| Test Cleavage | FW : CGCAAGCTTTAATACGACTCACTATAGGG | REV : Biot-CCCTATAGTGAGTCGTATTAAAGCTTGCGAT |
|---------------|------------------------------------|--------------------------------------------|
